# Supplementary material for: Shared Causal Paths underlying Alzheimer’s dementia and Type 2 Diabetes
Source: PubMed Central journal article supplement (PMC7058072; doi:10.1038/s41598-020-60682-3), 2020-03-05
Supplement: 41598_2020_60682_MOESM1_ESM.pdf [file 41598_2020_60682_MOESM1_ESM.pdf]

**Supplementary information for: “Shared Causal Paths underlying Alzheimer’s dementia and Type 2 Diabetes”**

**Authors: Zixin Hu, Rong Jiao, Panpan Wang, Yun Zhu, Jinying Zhao, Phil De Jager, David A Bennett, Li Jin and Momiao Xiong**

**Table S1.** P-values of causation and association of 8 both directly and indirectly connected to both TD and T2DM.

| <b>Gene</b>   | <b>T2DM</b>      |                    | <b>AD</b>        |                    |
|---------------|------------------|--------------------|------------------|--------------------|
|               | <b>Causation</b> | <b>Association</b> | <b>Causation</b> | <b>Association</b> |
| GTF2H2C       | <E-06            | 0.000156           | <E-06            | 0.075045           |
| NAIP          | <E-06            | 0.000785           | <E-06            | 0.057792           |
| RN7SL9P       | <E-06            | 0.000156           | <E-06            | 0.075045           |
| RP11-497H16.5 | <E-06            | 0.001671           | <E-06            | 0.182268           |
| RP11-497H16.6 | <E-06            | 0.000334           | <E-06            | 0.200074           |
| SERF1B        | <E-06            | 0.000447           | <E-06            | 0.163819           |
| SMN2          | <E-06            | 0.000447           | <E-06            | 0.163819           |
| ZNF658B       | <E-06            | 0.867831           | <E-06            | 0.102522           |

**Table S2.** P-value of 13 indirectly connected to AD and both directly and indirectly connected to T2DM causing genes.

| gene          | AD        |             | T2DM      |             |
|---------------|-----------|-------------|-----------|-------------|
|               | Causation | Association | Causation | Association |
| LINC01123     | <E-06     | 0.2090558   | <E-06     | 0.00782173  |
| ZBTB45P1      | <E-06     | 0.2090558   | <E-06     | 0.00782173  |
| GTF2H2C       | <E-06     | 0.04533735  | <E-06     | 0.00015593  |
| NAIP          | <E-06     | 0.02356008  | <E-06     | 0.00078518  |
| RN7SL9P       | <E-06     | 0.07504514  | <E-06     | 0.00015593  |
| RP11-497H16.5 | <E-06     | 0.02724587  | <E-06     | 0.00167078  |
| RP11-497H16.6 | <E-06     | 0.10619584  | <E-06     | 0.00033402  |
| SERF1B        | <E-06     | 0.01775603  | <E-06     | 0.0004467   |
| SMN2          | <E-06     | 0.01775603  | <E-06     | 0.0004467   |
| RN7SL763P     | <E-06     | 0.2426085   | <E-06     | 0.88758712  |
| RANP9         | <E-06     | 0.15309853  | <E-06     | 0.20641879  |
| ZNF658B       | <E-06     | 0.00674495  | <E-06     | 0.20367155  |
| AC132872.2    | <E-06     | 0.11890796  | <E-06     | 0.04748469  |

**Table S3.** P-value of 20 both directly and indirectly connected to AD and indirectly connected to T2DM causing genes.

| gene          | AD        |             | T2DM      |             |
|---------------|-----------|-------------|-----------|-------------|
|               | Causation | Association | Causation | Association |
| IGKV6D-21     | <E-06     | 0.00936     |           | 0.00838     |
| RN7SL632P     | <E-06     | 0.00053     |           | 0.10824     |
| CDH18         | <E-06     | 0.00736     |           | 0.11987     |
| HLA-DRB5      | <E-06     | 0.01958     |           | 0.01317     |
| RPL3P2        | <E-06     | 0.00391     |           | 0.05737     |
| FAM74A6       | <E-06     | 0.00256     |           | 0.17522     |
| RNU6-156P     | <E-06     | 0.00209     |           | 0.00086     |
| RP11-15J10.1  | <E-06     | 0.00876     |           | 0.01246     |
| RP11-262H14.4 | <E-06     | 0.00173     |           | 0.01412     |
| RP11-318K12.2 | <E-06     | 0.0031      |           | 0.00086     |
| RNU6-702P     | <E-06     | 0.01116     |           | 0.26546     |
| AL021920.1    | <E-06     | 0.00529     |           | 0.10803     |
| AL590452.1    | <E-06     | 0.0034      |           | 0.01512     |
| EIF1AXP1      | <E-06     | 0.00529     |           | 0.10803     |
| FAM231B       | <E-06     | 0.00187     |           | 0.28261     |
| PRAMEF11      | <E-06     | 0.00122     |           | 0.07388     |
| RP5-845O24.8  | <E-06     | 0.00122     |           | 0.07388     |
| TTC3          | <E-06     | 0.0102      |           | 0.01343     |
| AC009237.16   | <E-06     | 0.0024      |           | 0.17164     |
| AC009237.17   | <E-06     | 0.0024      |           | 0.17164     |

**Table S4.** A total of 19 gene expressions caused AD.

| gene                | AD        |             | T2DM      |             |
|---------------------|-----------|-------------|-----------|-------------|
|                     | Causation | Association | Causation | Association |
| <b>PLA2G15</b>      | <0.0001   | 0.0012      | 0.6633    | 0.7645      |
| <b>GRPEL2</b>       | <0.0001   | 0.0026      | 0.3611    | 0.9894      |
| <b>TCEAL6</b>       | <0.0001   | 0.0001      | 0.7324    | 0.3729      |
| <b>C19orf71</b>     | <0.0001   | 0.0002      | 0.8063    | 0.4285      |
| <b>GRTP1</b>        | <0.0001   | 0.0004      | 0.7326    | 0.4044      |
| <b>CTC-471C19.1</b> | <0.0001   | <0.0001     | 0.9039    | 0.8677      |
| <b>GAP43</b>        | <0.0001   | 0.0001      | 0.413     | 0.2183      |
| <b>NTNG1</b>        | <0.0001   | <0.0001     | 0.2216    | 0.298       |
| <b>BIN1</b>         | <0.0001   | 0.4087      | 0.9583    | 0.809       |
| <b>ZNF683</b>       | <0.0001   | 0.0098      | 0.5699    | 0.391       |
| <b>PIGS</b>         | <0.0001   | 0.0624      | 0.361     | 0.7423      |
| <b>MRPS18A</b>      | <0.0001   | 0.0004      | 0.4478    | 0.8081      |
| <b>PRKCD</b>        | 0.0001    | 0.0006      | 0.5847    | 0.0814      |
| <b>FNDC5</b>        | 0.0001    | 0           | 0.8283    | 0.9253      |
| <b>SLC7A14</b>      | 0.0001    | 0.0101      | 0.9696    | 0.7183      |
| <b>GRAMD1B</b>      | 0.0001    | 0.0171      | 0.0005    | 0.6413      |
| <b>USP12</b>        | 0.0001    | 0.041       | 0.5937    | 0.0269      |
| <b>DHRS7</b>        | 0.0001    | 0.0571      | 0.9111    | 0.4734      |
| <b>OAZ1</b>         | 0.0001    | 0.0089      | 0.7556    | 0.6632      |

**Table S5.** A total of 7 gene expressions causing T2DM, but did not cause AD.

| gene                 | AD        |             | T2DM      |             |
|----------------------|-----------|-------------|-----------|-------------|
|                      | Causation | Association | Causation | Association |
| <b>GRN</b>           | 0.3019    | 0.3037      | <0.0001   | <0.0001     |
| <b>ATP1B3</b>        | 0.3848    | 0.3358      | <0.0001   | <0.0001     |
| <b>CTD-3065J16.6</b> | 0.5351    | 0.2133      | <0.0001   | 0.4403      |
| <b>BX571672.1</b>    | 0.587     | 0.3088      | <0.0001   | 0.5182      |
| <b>SLC25A35</b>      | 0.7881    | 0.3619      | <0.0001   | 0.6975      |
| <b>PRR12</b>         | 0.9786    | 0.281       | <0.0001   | 0.3704      |
| <b>AOC3</b>          | 0.9936    | 0.0678      | <0.0001   | 0.1873      |

**Table S6.** A list of 17 methylated sites/genes that caused AD.

| <b>Methylated Gene</b> | <b>Causation</b> | <b>Association</b> |
|------------------------|------------------|--------------------|
| EMX2OS                 | < 1e-4           | 0.1973             |
| PIPOX                  | < 1e-4           | 0.6245             |
| DHX8                   | < 1e-4           | 0.7317             |
| cg04413644             | < 1e-4           | 0.0086             |
| cg12049093             | < 1e-4           | 0.1122             |
| cg21346589             | < 1e-4           | 0.235              |
| cg18527583             | < 1e-4           | 0.0126             |
| cg00639635             | < 1e-4           | 0.2032             |
| cg22133973             | < 1e-4           | 0.0004             |
| cg12644659             | < 1e-4           | 0.7813             |
| cg12949927             | < 1e-4           | 0.0915             |
| cg20714487             | < 1e-4           | 0                  |
| cg03701930             | < 1e-4           | 0.5572             |
| CARKD                  | < 1e-4           | 0.2309             |
| NYNRIN                 | < 1e-4           | 0.1213             |
| IL2RA                  | < 1e-4           | 0.8899             |
| cg02438164             | < 1e-4           | 0.0029             |

**Table S7.** A list of 27 methylated sites/genes that caused T2DM, but did not cause AD.

| <b>Methylated Gene</b> | <b>Causation</b> | <b>Association</b> |
|------------------------|------------------|--------------------|
| cg27424148             | < 1e-4           | 0.8752             |
| MIR220B                | < 1e-4           | 0.3568             |
| cg16991316             | < 1e-4           | 0.0292             |
| cg01433468             | < 1e-4           | 0.4165             |
| cg04124260             | < 1e-4           | 0.0587             |
| cg06769739             | < 1e-4           | 0.0004             |
| cg11989330             | < 1e-4           | 0.0006             |
| cg17883371             | < 1e-4           | 0.0075             |
| GSTTP1                 | < 1e-4           | 0.0016             |
| YWHAQ                  | < 1e-4           | 0.6393             |
| cg25004193             | < 1e-4           | 0.0001             |
| cg25757820             | < 1e-4           | 0.2169             |
| cg02093808             | < 1e-4           | 0.2378             |
| C11orf45               | < 1e-4           | 0.1566             |
| cg00850073             | < 1e-4           | 0.0136             |
| NME5                   | < 1e-4           | 0.1576             |
| cg14727987             | < 1e-4           | 0.0011             |
| cg10245123             | < 1e-4           | 0.0014             |
| MFHAS1                 | < 1e-4           | 0.5626             |
| cg11388673             | < 1e-4           | 0.6857             |
| cg18001780             | < 1e-4           | 0.0127             |
| KRT77                  | < 1e-4           | 0.0291             |
| cg16624888             | < 1e-4           | 0                  |
| TPT1                   | < 1e-4           | 0.2871             |
| CCDC70                 | < 1e-4           | 0.0186             |
| cg01358406             | < 1e-4           | 0.0119             |
| cg03608502             | < 1e-4           | 0.1001             |

**Table S8.** A list of 120 DNA methylation sites/genes that were indirectly connected to AD and T2DM.

| <b>Methylation Site/Gene</b> | <b>Expressed Genes</b> | <b>Causation</b> | <b>Association</b> |
|------------------------------|------------------------|------------------|--------------------|
| cg18747197                   | QKI                    | 0.00004          |                    |
| cg19351026                   | GABRA2                 | 0.00018          | 0.0000101          |
| cg27665808                   | snoU13                 | 0.00014          | 0.0000117          |
| GSTTP1                       | RP11-259G18.2          | 0.00007          | 0.0000155          |
| cg12363375                   | CTD-3025N20.2          | 0.00021          | 0.0000198          |
| cg16677162                   | GPX6                   | 0.00011          | 0.0000224          |
| cg13401079                   | RCOR1                  | 0.00015          | 0.0000277          |
| cg17670237                   | RP11-259G18.2          | 0.00015          | 0.0000277          |
| cg07536144                   | U1                     | 0.00001          | 0.0000458          |
| ABCA10                       | RP11-86H7.7            | 0.0001           | 0.0000464          |
| cg22463795                   | GABRA2                 | 0.00019          | 0.0000465          |
| cg01797450                   | ASS1                   | 0.00008          | 0.0000503          |
| cg23454003                   | PSMB6                  | 0.00009          | 0.0000545          |
| cg05455747                   | ZC3H4                  | 0                | 0.0000623          |
| cg17526301                   | GPX6                   | 0.00003          | 0.0000806          |
| cg10061805                   | PPIAP2                 | 0.00018          | 0.000152878        |
| cg02190400                   | ZC3H4                  | 0.00005          | 0.000166344        |
| cg15304404                   | RXFP4                  | 0.00028          | 0.000182858        |
| cg24751928                   | CTD-2501E16.2          | 0.00004          | 0.00019633         |
| cg17125990                   | GABRA2                 | 0.00003          | 0.000205598        |
| cg00415011                   | GARNL3                 | 0                | 0.000208346        |
| cg23340218                   | WNT3A                  | 0.00003          | 0.000244508        |
| cg26274929                   | UTP6                   | 0.00005          | 0.00026591         |
| cg09977969                   | CTD-2116F7.1           | 0.0002           | 0.000268455        |
| cg02461269                   | CTD-3025N20.2          | 0.00006          | 0.000315482        |
| cg02523270                   | GARNL3                 | 0.00036          | 0.00032395         |
| cg09550810                   | GARNL3                 | 0.00002          | 0.000380359        |
| cg07475973                   | RP11-265D19.6          | 0.00012          | 0.000391326        |
| cg21686890                   | ABCB6                  | 0.00002          | 0.000398401        |
| cg21099148                   | snoU13                 | 0.00019          | 0.000425933        |
| cg01870681                   | GPX6                   | 0.00019          | 0.000440409        |
| cg25112877                   | WNT3A                  | 0.00014          | 0.000463058        |
| cg19711815                   | RP11-259G18.2          | 0.00008          | 0.000548779        |
| cg06447341                   | TTC37                  | 0.00003          | 0.000685772        |
| ch.2.3048096R                | ASS1                   | 0.00002          | 0.000716838        |
| cg07536144                   | PLCH1-AS1              | 0.00009          | 0.000744448        |



|            |               |         |             |
|------------|---------------|---------|-------------|
| cg15426660 | snoU13        | 0.00001 | 0.000760849 |
| cg08209099 | RP11-259G18.2 | 0.00007 | 0.000785023 |
| cg22891595 | GARNL3        | 0.00001 | 0.000870647 |
| cg06181286 | CBLN4         | 0       | 0.000984836 |
| cg14739859 | RP11-259G18.2 | 0.00005 | 0.000989198 |
| cg12548341 | GNAL          | 0.00013 | 0.001060884 |
| cg15426660 | SNTB2         | 0.00009 | 0.001162623 |
| cg10059756 | GABRA2        | 0.00004 | 0.001207758 |
| cg21205865 | snoU13        | 0.00004 | 0.00131807  |
| cg00039801 | RP11-259G18.2 | 0.00006 | 0.001347476 |
| cg10316834 | snoU13        | 0.0001  | 0.001351471 |
| cg20078879 | RPS4X         | 0.00009 | 0.001369325 |
| cg24015081 | CTD-2176I21.1 | 0.00018 | 0.00144952  |
| cg25214310 | SUGT1         | 0.00037 | 0.001534327 |
| cg14687029 | ABCB6         | 0.00008 | 0.001560267 |
| cg05157340 | RANBP2        | 0.00014 | 0.00199909  |
| cg06709828 | CTD-3025N20.2 | 0       | 0.00207517  |
| cg06112654 | SNTB2         | 0.00004 | 0.002087027 |
| cg06112654 | snoU13        | 0.00006 | 0.002181983 |
| cg22651787 | FAM188B       | 0.00005 | 0.002497132 |
| cg14577406 | RBPM2         | 0       | 0.002576388 |
| cg04854637 | SUGT1         | 0.00003 | 0.003268184 |
| cg12180270 | GABRA2        | 0.00002 | 0.003306246 |
| cg04606076 | RXFP4         | 0.00012 | 0.00331699  |
| cg02486332 | CASP12        | 0.00012 | 0.003429848 |
| cg11868247 | RP11-351K16.4 | 0.00007 | 0.003504288 |
| cg13001963 | RXFP4         | 0       | 0.00399057  |
| cg24430419 | snoU13        | 0.0001  | 0.004028793 |
| cg07716131 | SAA1          | 0.00016 | 0.004568173 |
| MIR145     | RCOR1         | 0.00003 | 0.004796959 |
| cg16101962 | GARNL3        | 0.00002 | 0.00494505  |
| cg10238080 | snoU13        | 0.00063 | 0.005006355 |
| cg12094552 | SNTB2         | 0.00005 | 0.005246665 |
| cg23346544 | ARHGAP20      | 0       | 0.005555473 |
| cg13332807 | PKN2          | 0.00013 | 0.006109406 |
| TDGF1      | ST6GALNAC6    | 0.00005 | 0.007245283 |
| cg24617444 | RUSC1         | 0       | 0.007756879 |
| ANKRD53    | CPE           | 0.00021 | 0.007916803 |
| cg20918393 | PPIAP2        | 0.00009 | 0.008203878 |
| cg23925513 | RARB          | 0.00012 | 0.008650139 |
| cg18105749 | BRSK2         | 0.00005 | 0.009148187 |

|                  |               |         |             |
|------------------|---------------|---------|-------------|
| cg16624888       | RXFP4         | 0.00006 | 0.009483327 |
| cg09315586       | SUGT1         | 0.00001 | 0.009806715 |
| cg20078879       | DNAJC1        | 0.00007 | 0.010129593 |
| cg00651087       | ZNF114        | 0.00005 | 0.011173318 |
| cg04606076       | C2CD2L        | 0.00015 | 0.012211784 |
| cg10061805       | FAN1          | 0.00019 | 0.012503808 |
| cg25900943       | SNTB2         | 0.00001 | 0.013080748 |
| HRCT1            | DCTN2         | 0.00028 | 0.01314581  |
| cg05521150       | PMS2CL        | 0.00005 | 0.014411814 |
| cg11868247       | CSNK1G1       | 0.00007 | 0.014603357 |
| cg11868247       | EIF6          | 0.00006 | 0.016552782 |
| cg24631482       | LA16c-444G7.2 | 0.00005 | 0.017664588 |
| cg04858776       | OR2L13        | 0.00015 | 0.018602077 |
| cg15022039       | SRD5A1        | 0.00033 | 0.018987855 |
| C6orf223         | SMO           | 0.00003 | 0.020149091 |
| cg17624891       | DGKK          | 0.00007 | 0.020430983 |
| cg25816127       | WNT3A         | 0       | 0.020805286 |
| cg26686150       | FAM213B       | 0.00001 | 0.021353401 |
| cg19937979       | hsa-mir-146a  | 0.00002 | 0.021459718 |
| cg04819760       | FAH           | 0.00057 | 0.022816943 |
| cg07929768       | POTEG         | 0.00016 | 0.023349672 |
| cg26095395       | ADRA1B        | 0       | 0.025356864 |
| cg14145524       | XRCC5         | 0       | 0.025570462 |
| cg17214023       | INPP5F        | 0.00008 | 0.025878158 |
| cg16609139       | SDS           | 0.00013 | 0.027422099 |
| ch.11.96774805R  | RPS4X         | 0.00003 | 0.027946801 |
| ch.10.109266902R | RP11-351K16.4 | 0.00013 | 0.029508409 |
| cg02796279       | OR7C1         | 0.00004 | 0.032915515 |
| cg19937979       | NDUFA8        | 0.00003 | 0.034228407 |
| ch.2.1894803R    | NUMB          | 0.00006 | 0.034430887 |
| cg14257429       | SNTB2         | 0.00002 | 0.036581547 |
| cg08122831       | RP11-284N8.3  | 0.00001 | 0.037802122 |
| cg11465213       | EXOSC2        | 0.00006 | 0.040519116 |
| cg05766107       | ADCYAP1R1     | 0.00005 | 0.040760293 |
| cg00895132       | ZNF233        | 0.00003 | 0.041852386 |
| cg19355069       | ESD           | 0.00014 | 0.043231379 |
| cg18978531       | C2orf18       | 0.00009 | 0.047170478 |
| MYCT1            | RP11-265D19.6 | 0.00002 | 0.047607389 |
| cg03257930       | FADS6         | 0.00003 | 0.048071635 |
| cg11540476       | RP11-114F3.5  | 0.00001 | 0.048588166 |

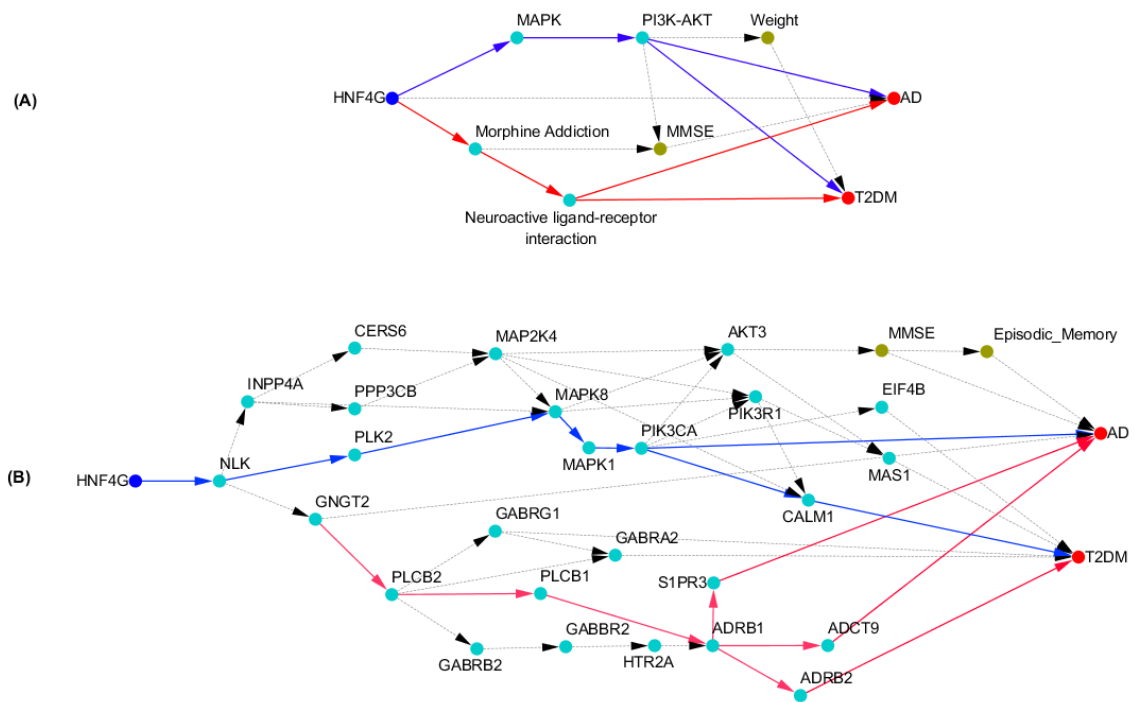

**Figure S1.** (A) Shared morphine addiction and neuroactive ligand receptor interaction pathways between AD and T2DM; (B) Shared causal subnetwork structure from HNF4G to AD and T2DM.

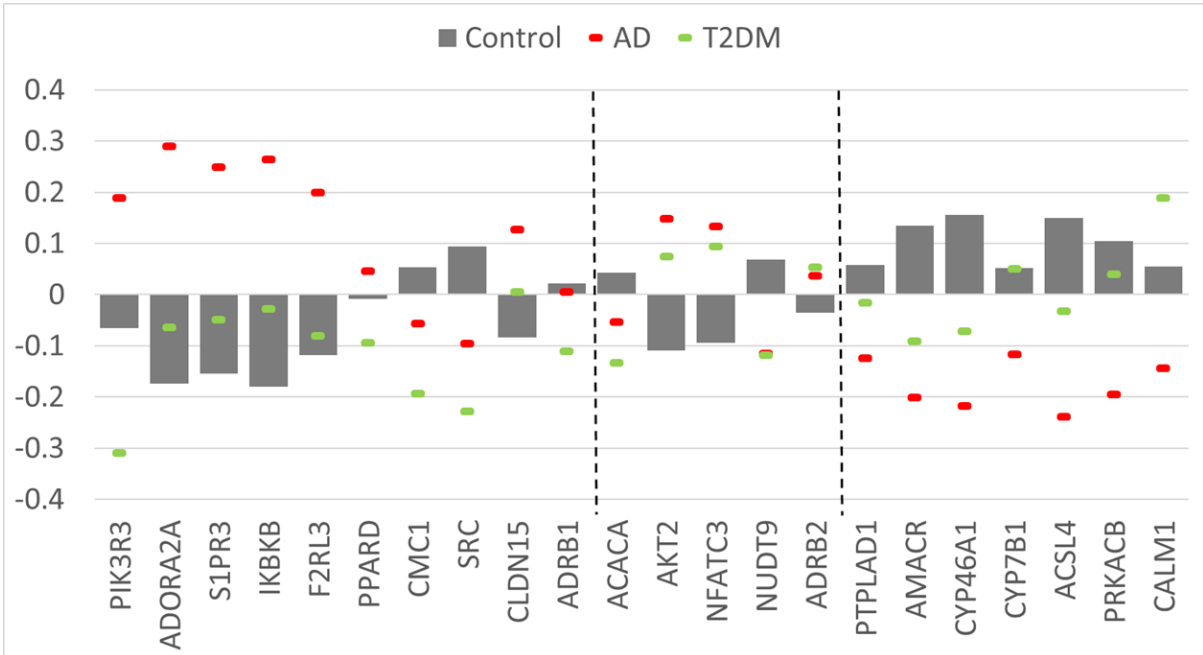

**Figure S2.** Average expression levels of genes in Figure 3 for AD, T2DM and normal individuals where gene expression levels were normalized.

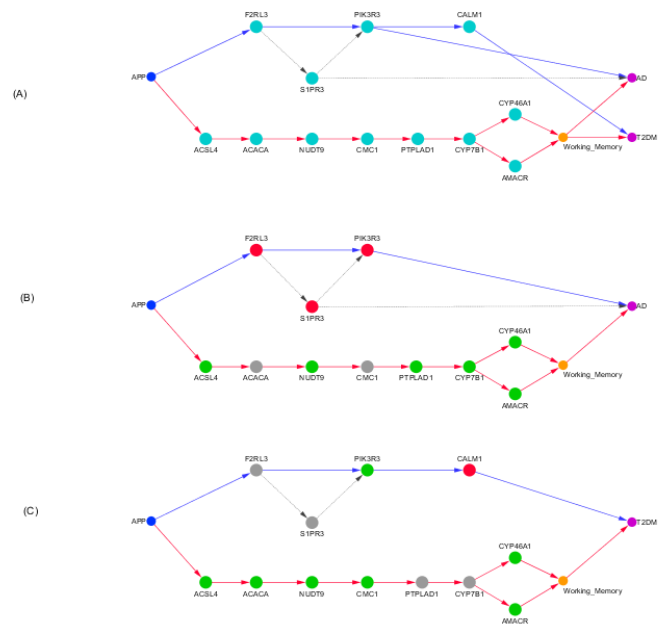

**Figure S3.** (A) Two major causal paths from APP to AD and T2DM in Figure 3; (B) Differential expressions of the genes along two major causal paths in (A) between AD and normal individuals where the nodes in red color represented over expressed genes, the nodes in green color represented the under expressed genes and the nodes in the grey color represented the genes showing no differential expressions; (C) Differential expressions of the genes along two major causal paths in (A) between T2DM and normal individuals where the nodes in red color represented over expressed genes, the nodes in green color represented the under expressed genes and the nodes in the grey color represented the genes showing no differential expressions.
